# Supplementary material for: Evolutionary analysis of polyproline motifs in Escherichia coli reveals their regulatory role in translation
Source: PubMed Central journal article supplement (PMC5811046; doi:10.1371/journal.pcbi.1005987), 2018-02-01

Number of random sequence sets

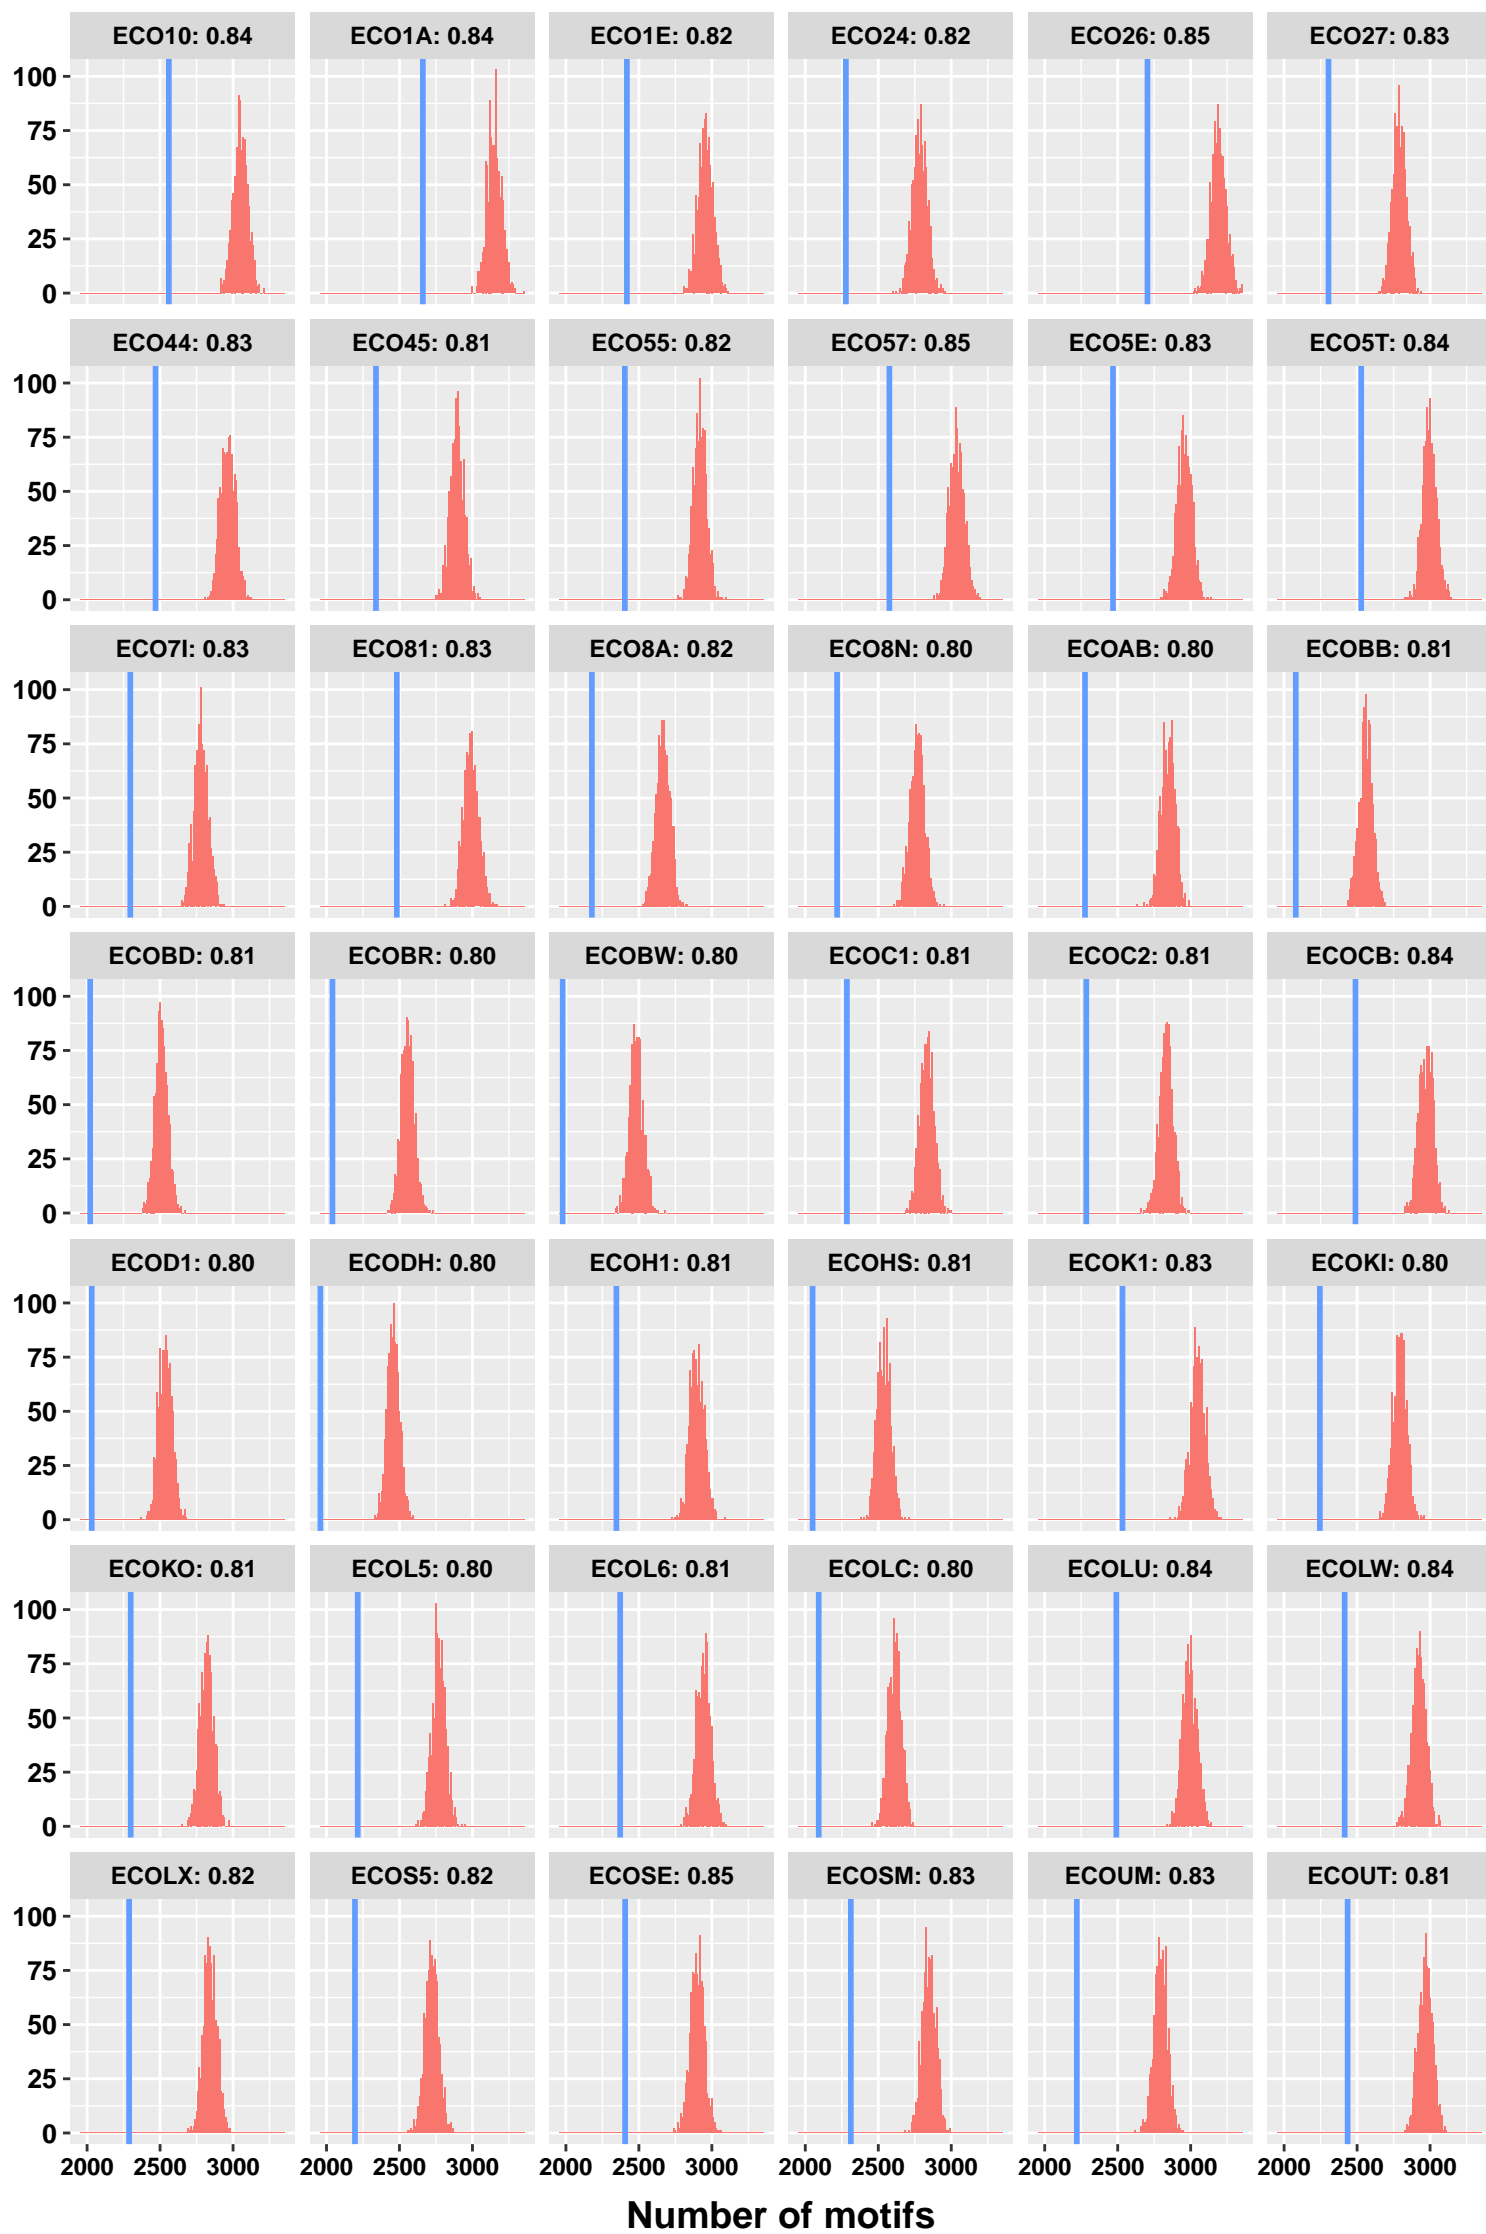

Supplement: pcbi.1005987.s002.pdf [file pcbi.1005987.s002.pdf]
