# Supplementary material for: Evolutionary analysis of polyproline motifs in Escherichia coli reveals their regulatory role in translation
Source: PubMed Central journal article supplement (PMC5811046; doi:10.1371/journal.pcbi.1005987), 2018-02-01
Supplement: pcbi.1005987.s005.pdf [file pcbi.1005987.s005.pdf]

## Core proteome

0.9  
0.8  
0.7

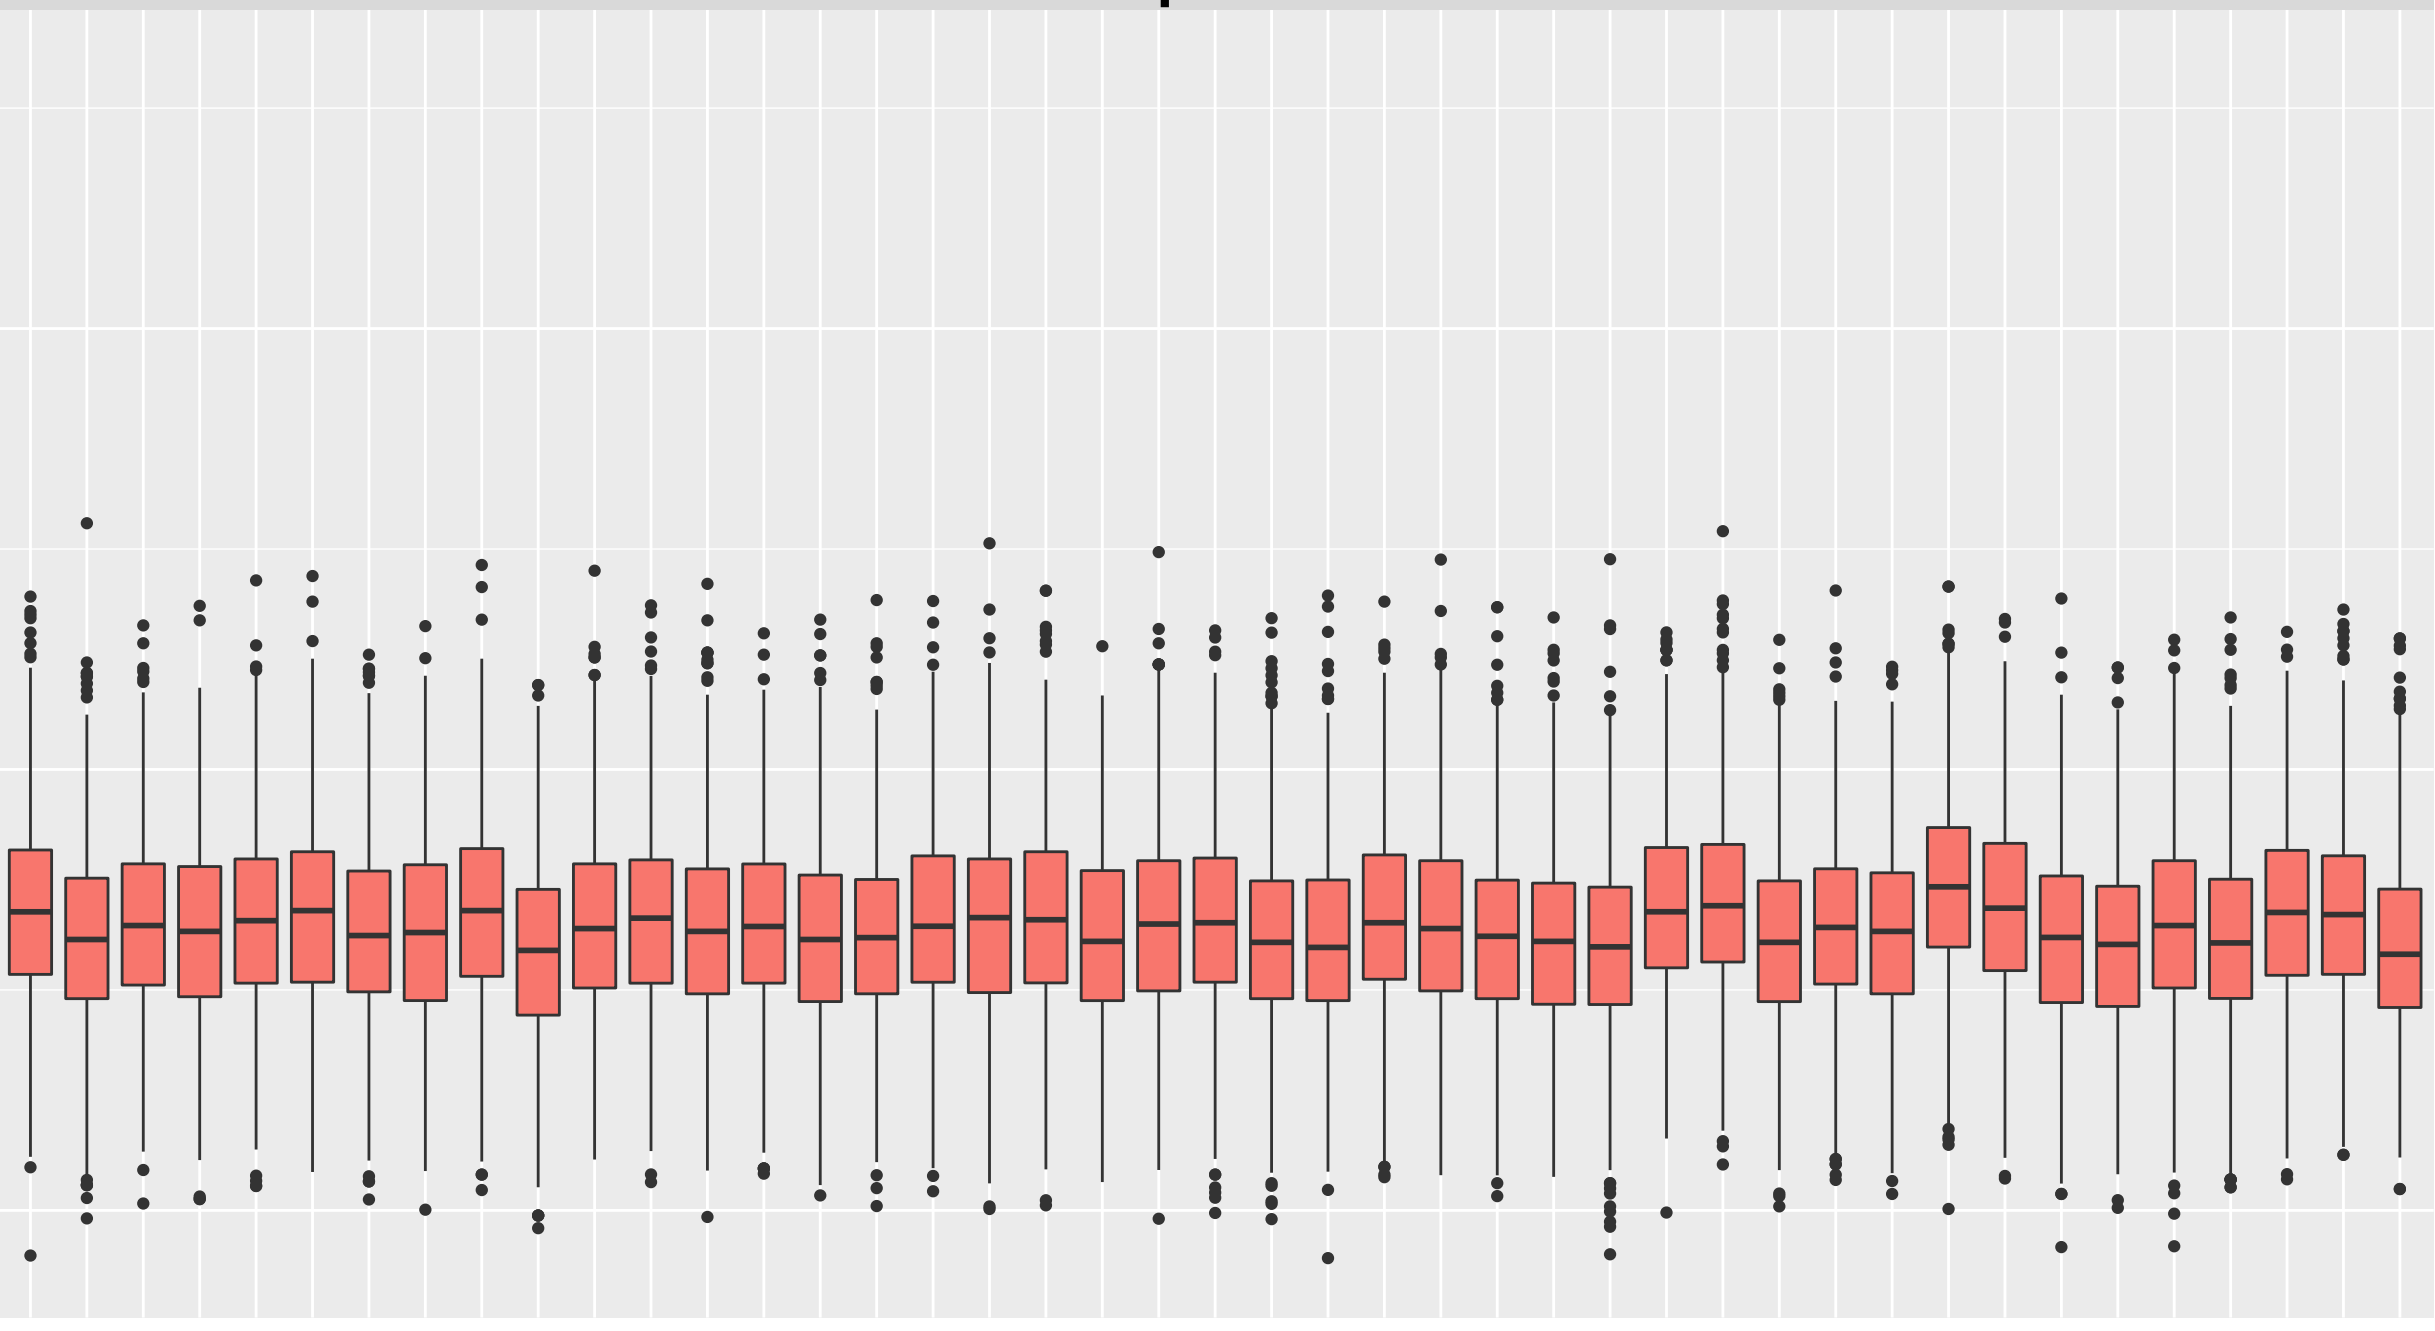

## Accessory proteome

0.9  
0.8  
0.7

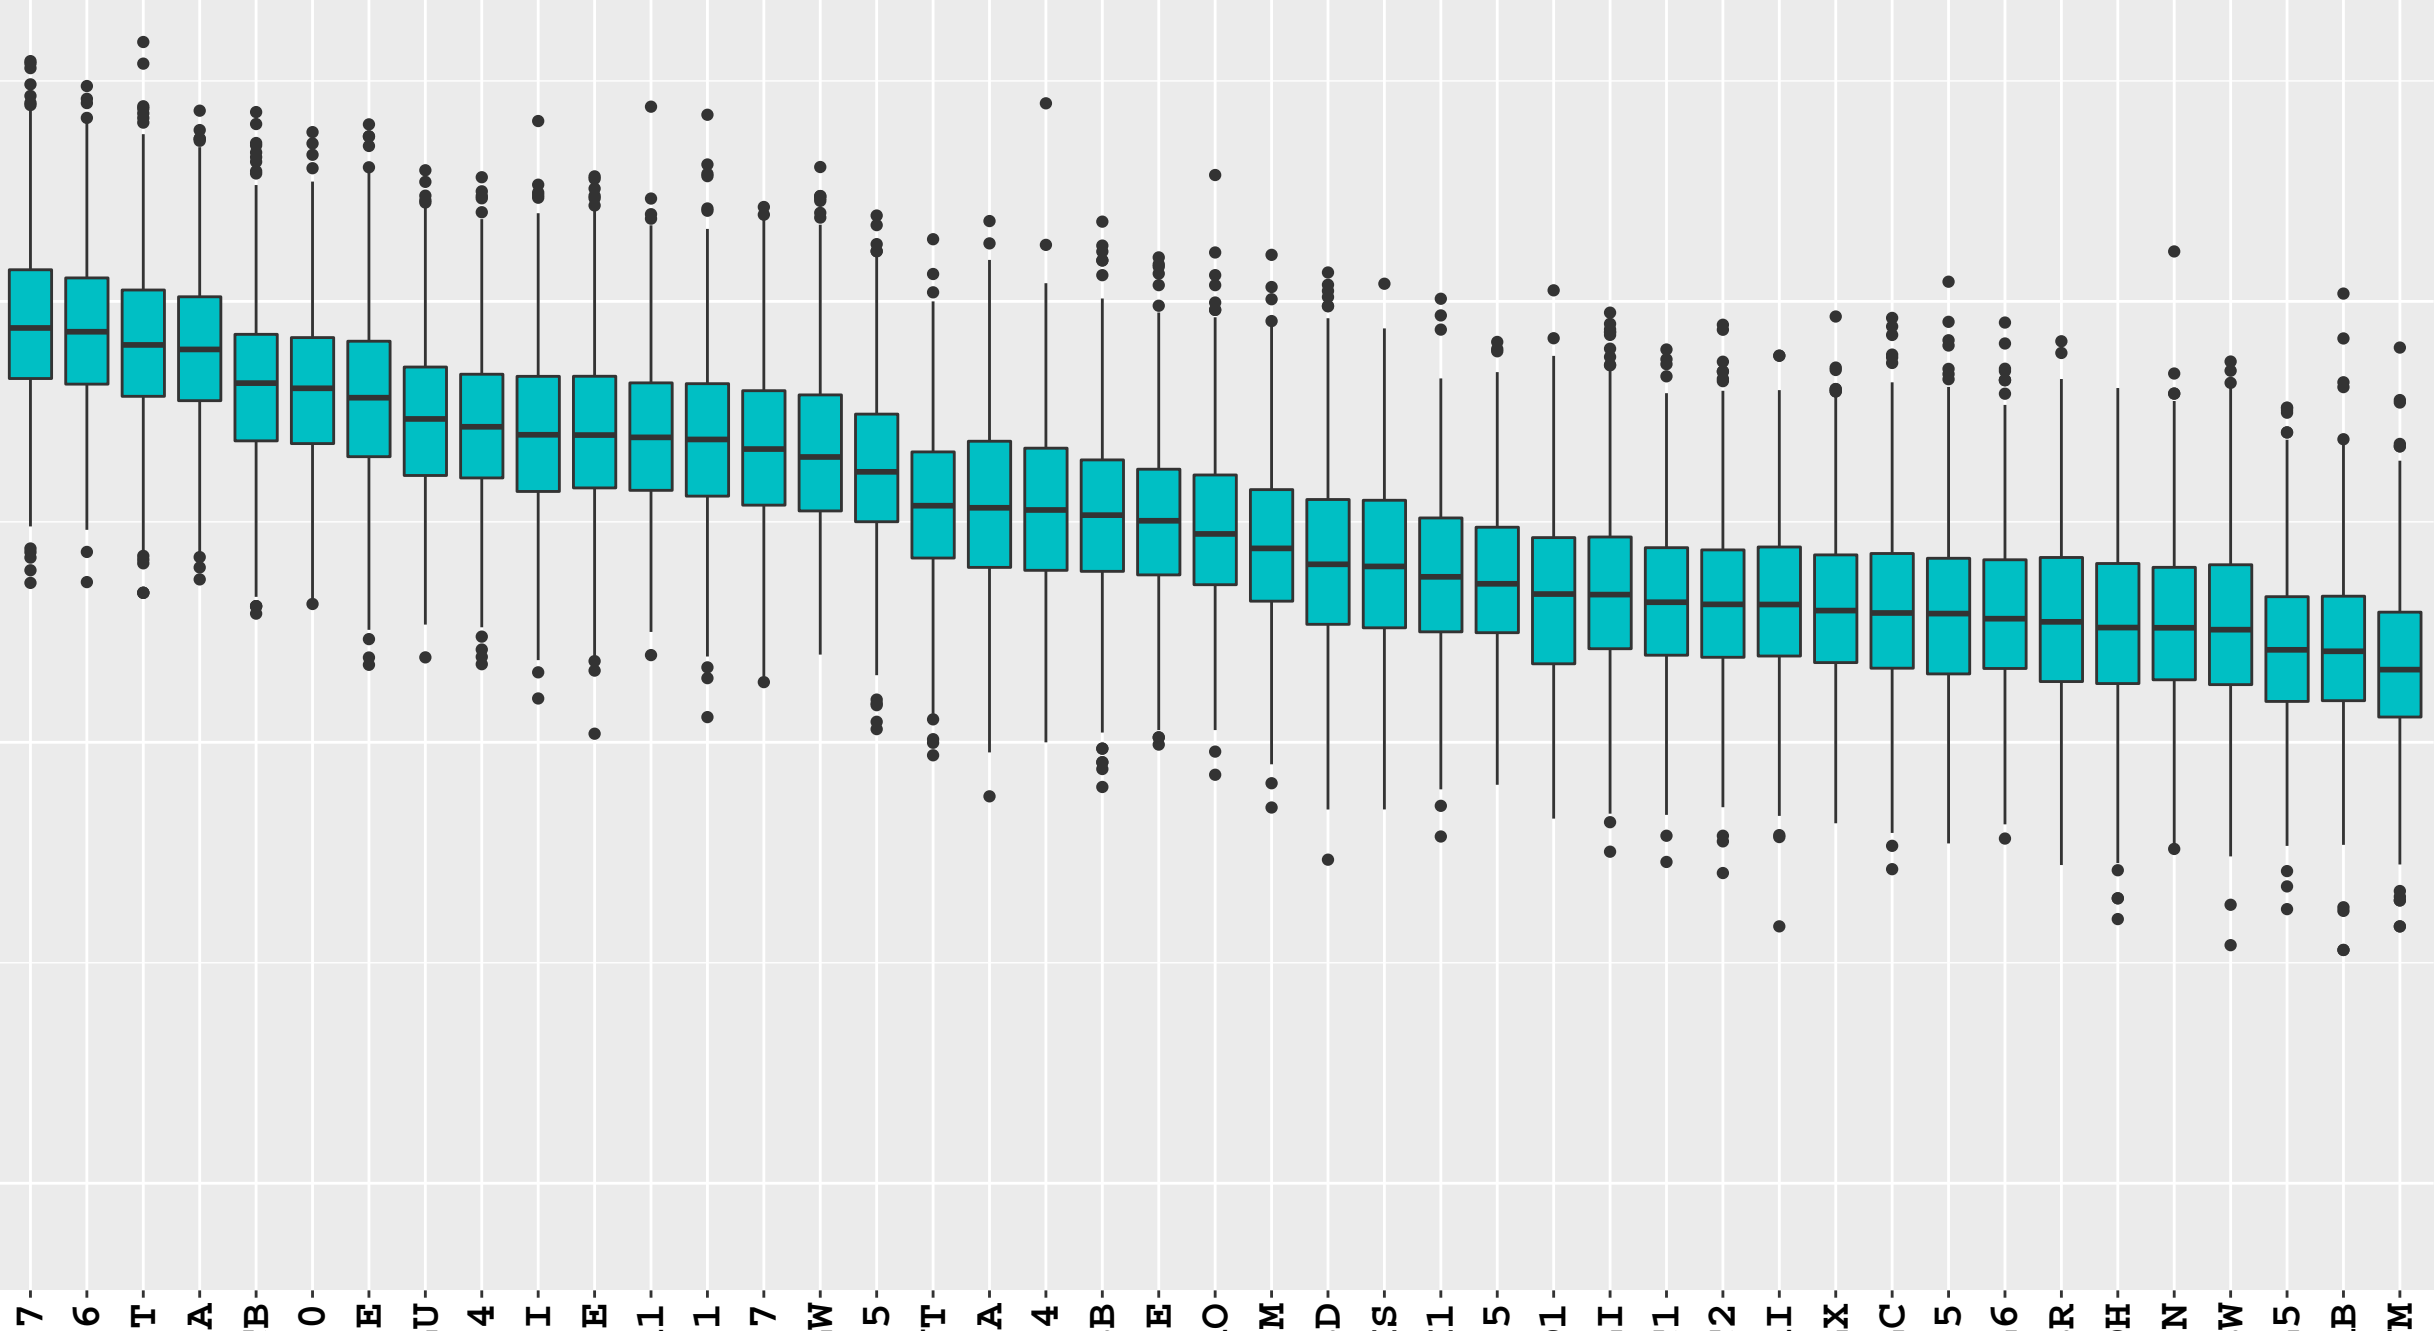

Strains

ECO57 ECO26 ECO5T ECO1A ECOCB ECO10 ECO5E ECO1U ECO44 ECO7I ECO5E ECOK1 ECO81 ECO27 ECO1W ECO55 ECO1U ECO8A ECO24 ECOBB ECO1E ECOKO ECOSM ECOBD ECOHS ECOH1 ECO45 ECOD1 ECOLI ECOC1 ECOC2 ECKI ECOLX ECOLC ECOS5 ECOL6 ECOBR ECODH ECO8N ECOBW ECOL5 ECOAB ECOUM
