# Supplementary material for: Evolutionary analysis of polyproline motifs in Escherichia coli reveals their regulatory role in translation
Source: PubMed Central journal article supplement (PMC5811046; doi:10.1371/journal.pcbi.1005987), 2018-02-01

**Number of TMH**

4000  
3000  
2000  
1000  
0

10

**Length of TMH**

20

30

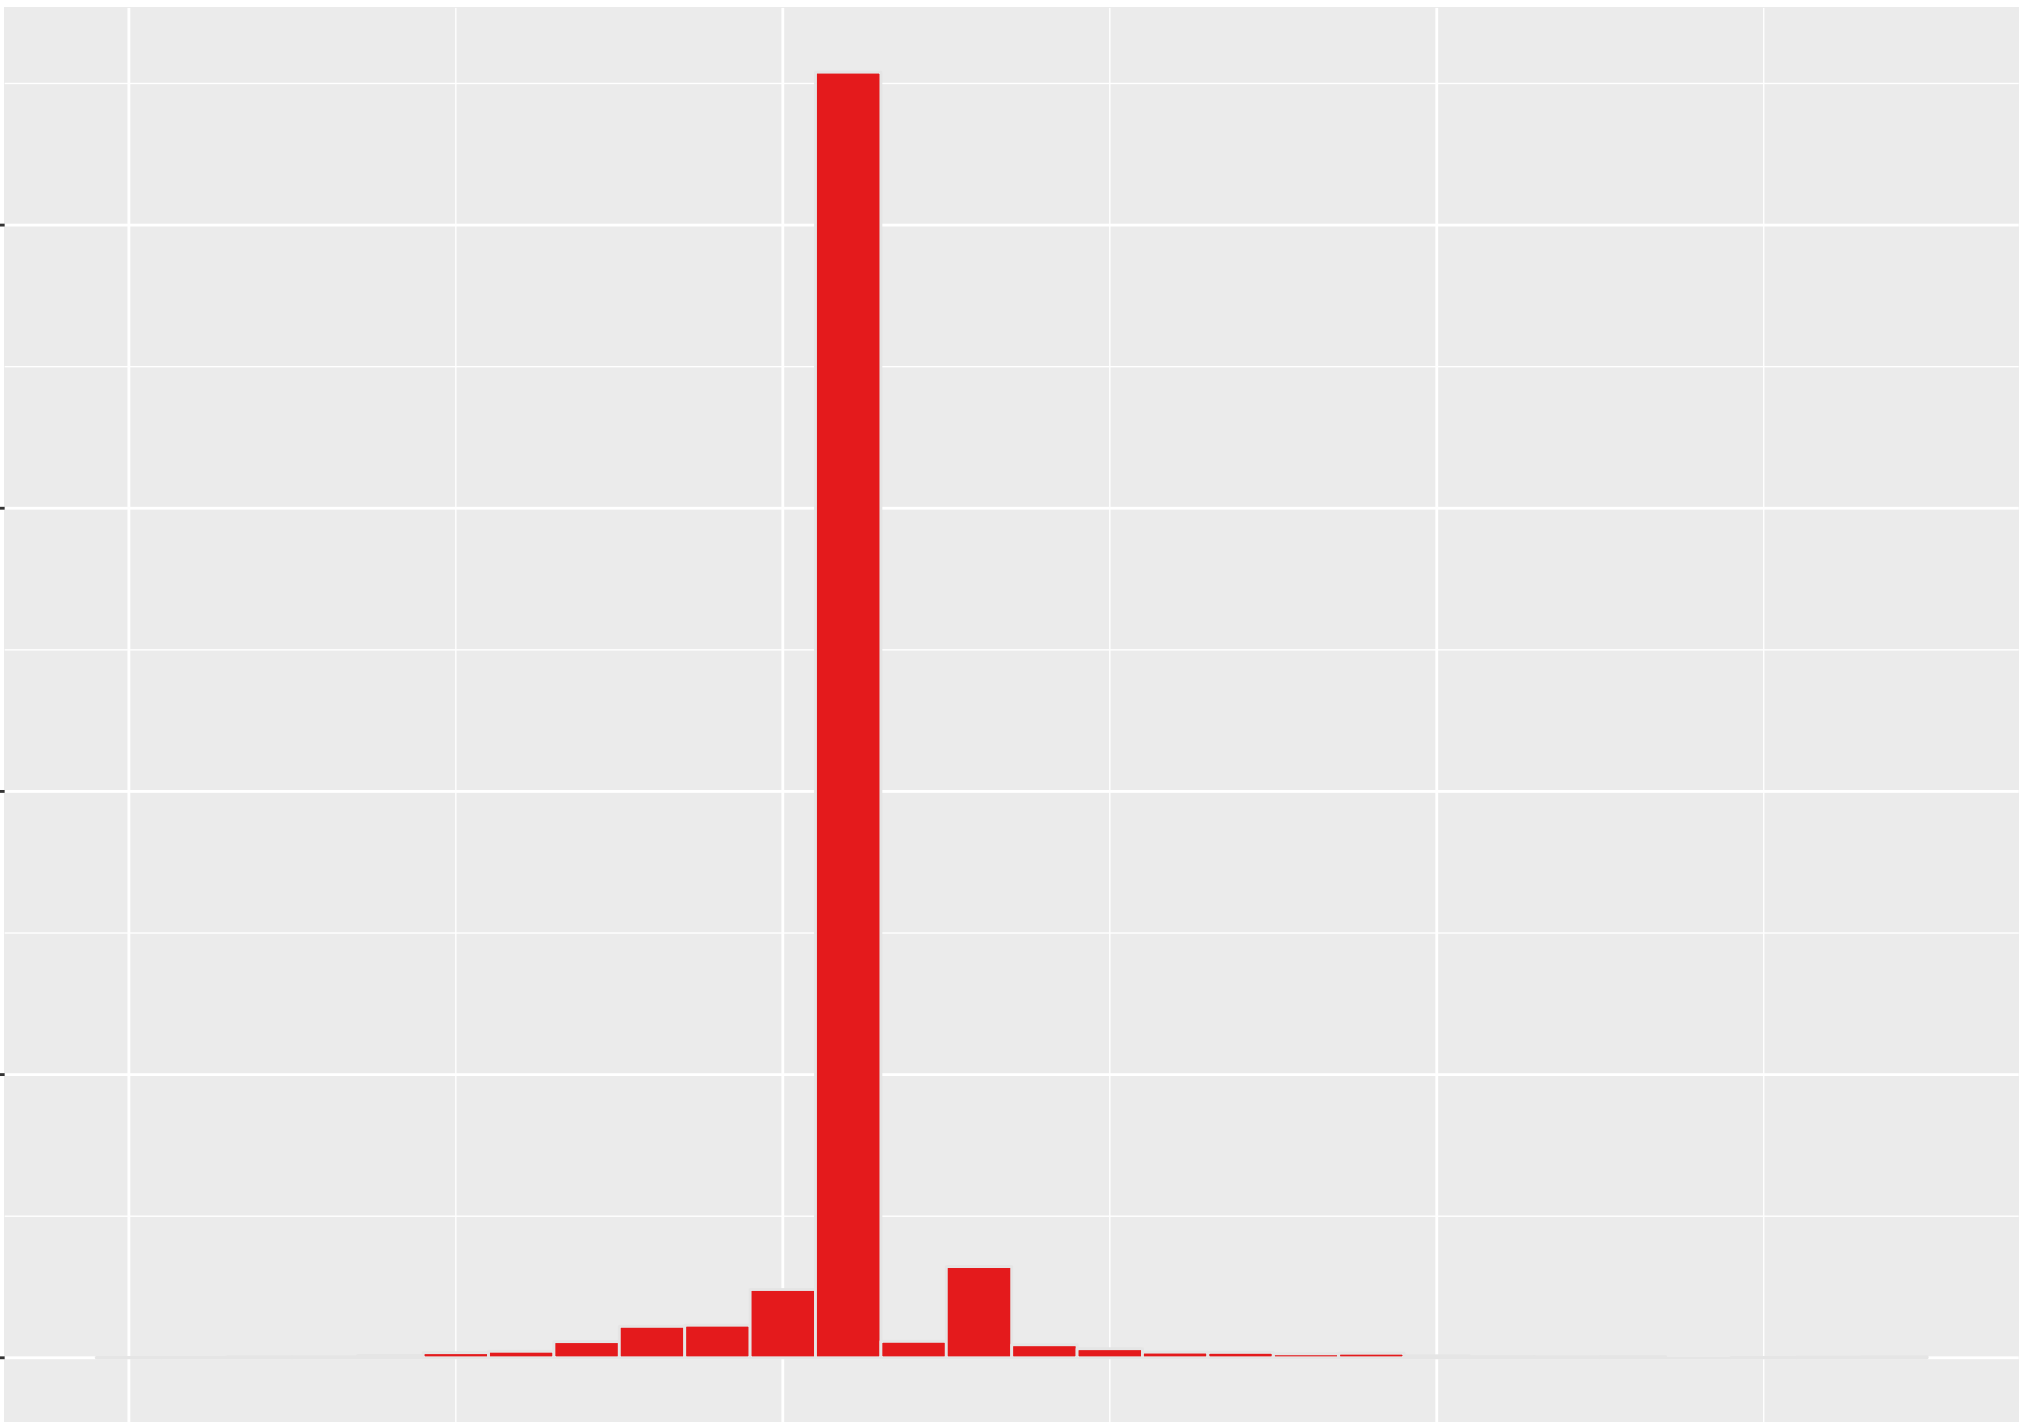

Supplement: pcbi.1005987.s007.pdf [file pcbi.1005987.s007.pdf]
