# Supplementary material for: Evolutionary analysis of polyproline motifs in Escherichia coli reveals their regulatory role in translation
Source: PubMed Central journal article supplement (PMC5811046; doi:10.1371/journal.pcbi.1005987), 2018-02-01
Supplement: pcbi.1005987.s008.pdf [file pcbi.1005987.s008.pdf]

Number of random sequence sets

strain 168: 0.74

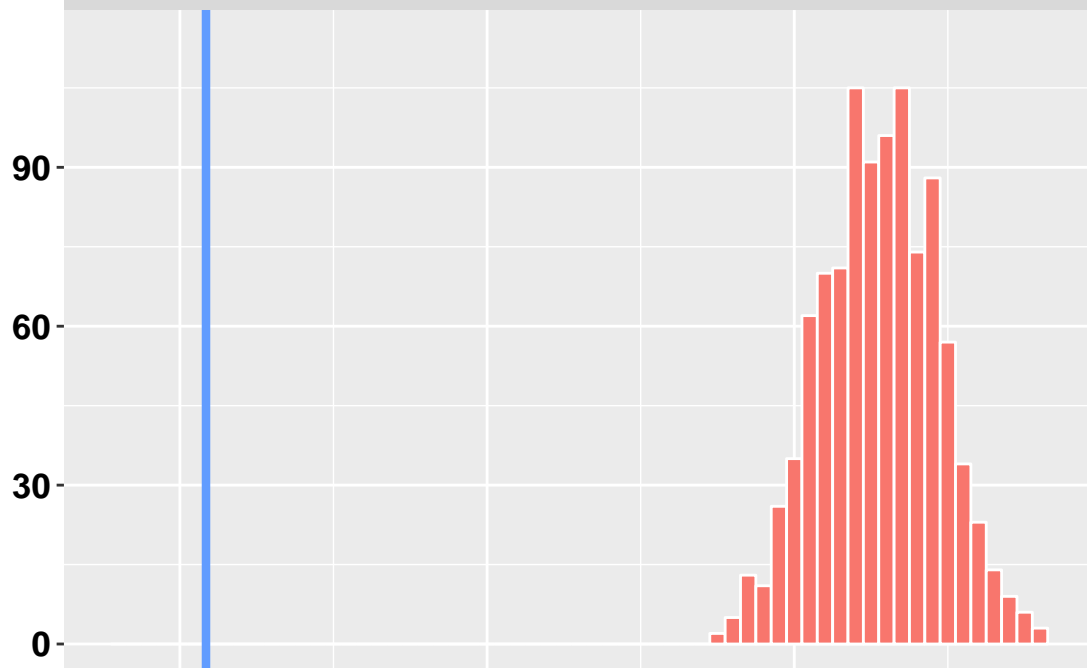

strain BSn5: 0.73

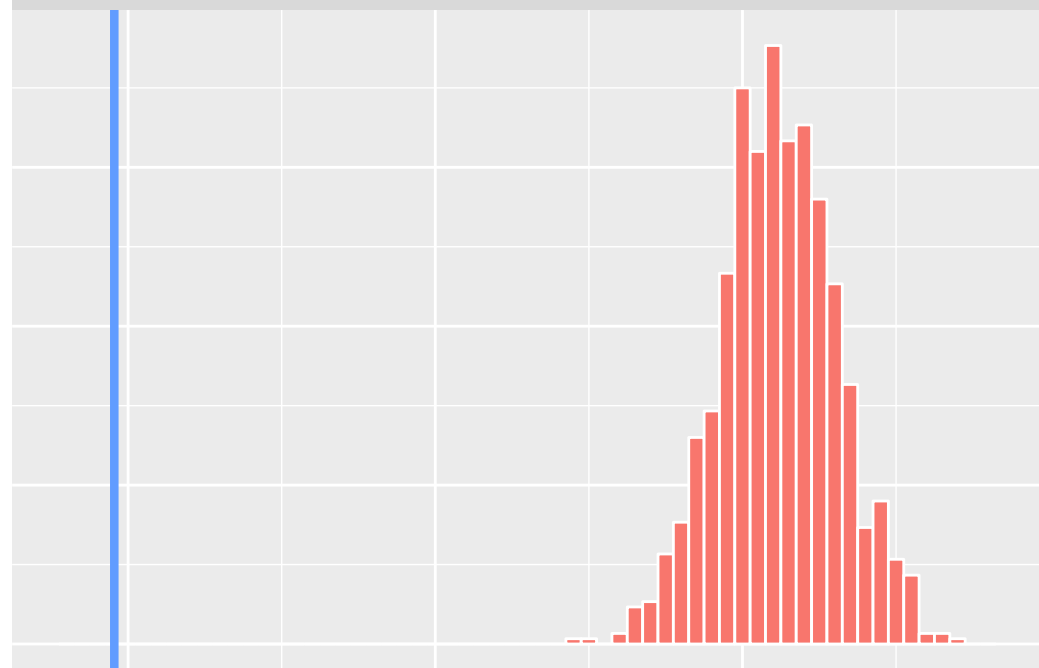

strain TU-B-10: 0.73

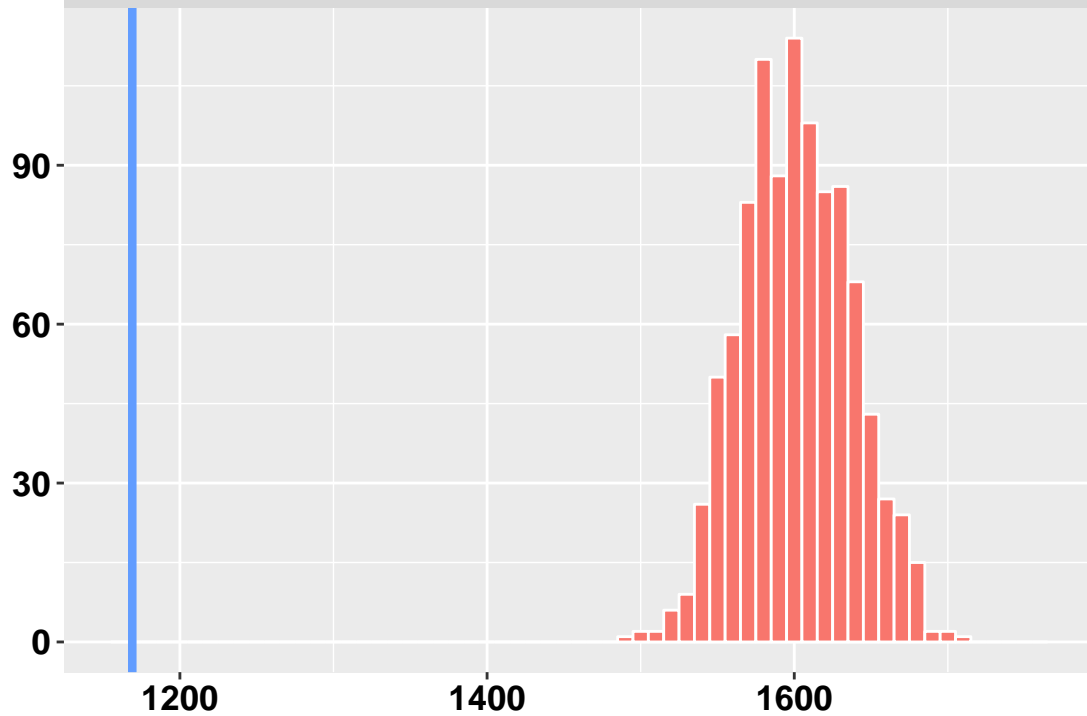

strain W23: 0.72

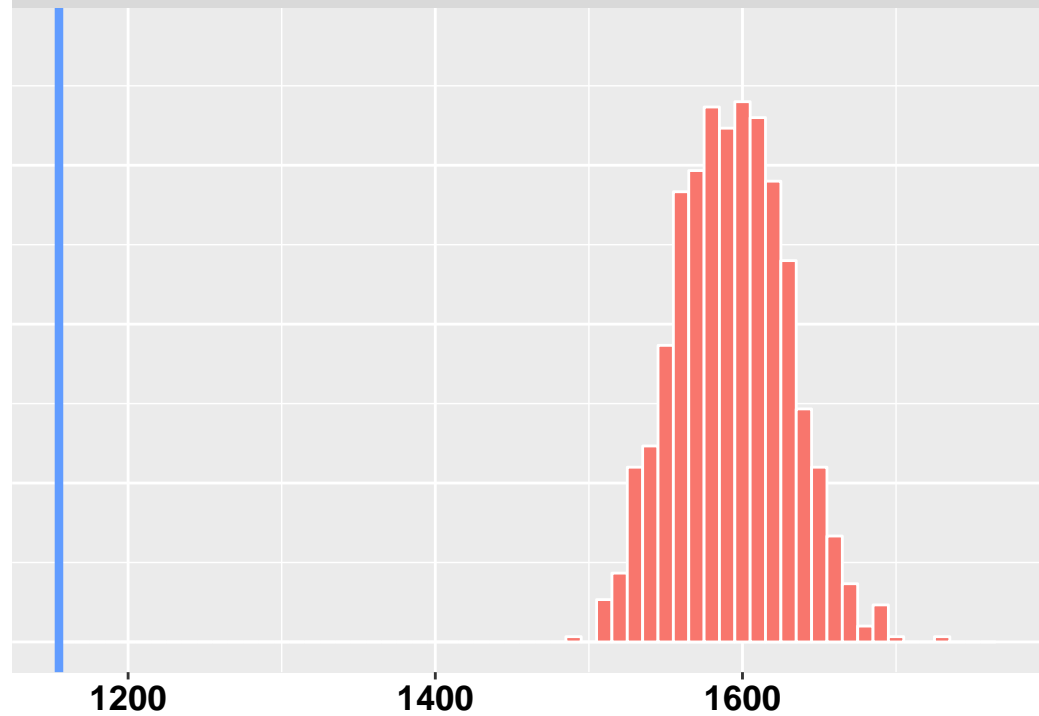

Number of motifs
