# Supplementary material for: Evolutionary analysis of polyproline motifs in Escherichia coli reveals their regulatory role in translation
Source: PubMed Central journal article supplement (PMC5811046; doi:10.1371/journal.pcbi.1005987), 2018-02-01
Supplement: pcbi.1005987.s013.pdf [file pcbi.1005987.s013.pdf]

S4 Table. Rules for the prediction of ribosomal stalling strength induced by a  $X_{(-2)}X_{(-1)}-nP-X_{(+1)}$  motif.

| <b>I. Rules for <math>n &gt; 3</math>: all motifs are classified as strong</b>                                                                                                            |            |           |            |                |         |
|-------------------------------------------------------------------------------------------------------------------------------------------------------------------------------------------|------------|-----------|------------|----------------|---------|
| <b>II. Rules for <math>n = 3</math>: put the first proline at <math>X_{(-1)}</math> position</b>                                                                                          |            |           |            |                |         |
| $X_{(-2)}$                                                                                                                                                                                | $X_{(-1)}$ |           | $X_{(+1)}$ | motif strength | Example |
| strong                                                                                                                                                                                    | <b>P</b>   | <b>PP</b> | strong     | strong         | KPPPD   |
| strong                                                                                                                                                                                    | <b>P</b>   | <b>PP</b> | medium     | strong         | KPPPK   |
| strong                                                                                                                                                                                    | <b>P</b>   | <b>PP</b> | weak       | strong         | KPPPC   |
| $X_{(-2)}$                                                                                                                                                                                | $X_{(-1)}$ |           | $X_{(+1)}$ | motif strength | Example |
| medium                                                                                                                                                                                    | <b>P</b>   | <b>PP</b> | strong     | strong         | FPPPD   |
| medium                                                                                                                                                                                    | <b>P</b>   | <b>PP</b> | medium     | medium         | FPPPK   |
| medium                                                                                                                                                                                    | <b>P</b>   | <b>PP</b> | weak       | medium         | FPPPC   |
| $X_{(-2)}$                                                                                                                                                                                | $X_{(-1)}$ |           | $X_{(+1)}$ | motif strength | Example |
| weak                                                                                                                                                                                      | <b>P</b>   | <b>PP</b> | strong     | strong         | SPPPD   |
| weak                                                                                                                                                                                      | <b>P</b>   | <b>PP</b> | medium     | medium         | SPPPK   |
| weak                                                                                                                                                                                      | <b>P</b>   | <b>PP</b> | weak       | weak           | SPPPC   |
| <b>III. Rules for <math>n = 2</math></b>                                                                                                                                                  |            |           |            |                |         |
| <b>If <math>X_{(+1)} = \text{strong}</math>, classify <math>X_{(-1)}</math> using the rule for <math>X_{(-2)}</math></b>                                                                  |            |           | $X_{(+1)}$ | motif strength | Example |
|                                                                                                                                                                                           | strong     | <b>PP</b> | strong     | strong         | KPPD    |
|                                                                                                                                                                                           | medium     | <b>PP</b> | strong     | medium         | FPPD    |
|                                                                                                                                                                                           | weak       | <b>PP</b> | strong     | weak           | SPPD    |
| $X_{(-2)}$                                                                                                                                                                                | $X_{(-1)}$ |           | $X_{(+1)}$ | motif strength | Example |
| strong                                                                                                                                                                                    | strong     | <b>PP</b> | medium     | strong         | KGPPK   |
| strong                                                                                                                                                                                    | medium     | <b>PP</b> | medium     | medium         | KEPPK   |
| medium                                                                                                                                                                                    | strong     | <b>PP</b> | medium     | medium         | FGPPK   |
| medium                                                                                                                                                                                    | medium     | <b>PP</b> | medium     | medium         | FEPPK   |
| <b>If <math>X_{(+1)} = \text{medium}</math> and <math>X_{(-2)}</math> or <math>X_{(-1)} = \text{weak}</math>, classify <math>X_{(-1)}</math> using the rule for <math>X_{(-2)}</math></b> |            |           | $X_{(+1)}$ | motif strength | Example |
|                                                                                                                                                                                           | strong     | <b>PP</b> | medium     | medium         | TIPPK   |
|                                                                                                                                                                                           | medium     | <b>PP</b> | medium     | medium         | AFPPK   |
|                                                                                                                                                                                           | weak       | <b>PP</b> | medium     | weak           | ACPPK   |
| $X_{(-2)}$                                                                                                                                                                                | $X_{(-1)}$ |           | $X_{(+1)}$ | motif strength | Example |
| strong                                                                                                                                                                                    | strong     | <b>PP</b> | weak       | strong         | KGPPC   |
| strong                                                                                                                                                                                    | medium     | <b>PP</b> | weak       | medium         | KEPPC   |
| strong                                                                                                                                                                                    | weak       | <b>PP</b> | weak       | weak           | KCPPC   |
| medium                                                                                                                                                                                    | strong     | <b>PP</b> | weak       | medium         | FGPPC   |
| medium                                                                                                                                                                                    | medium     | <b>PP</b> | weak       | medium         | FEPPC   |
| medium                                                                                                                                                                                    | weak       | <b>PP</b> | weak       | weak           | FCPPC   |
| weak                                                                                                                                                                                      | strong     | <b>PP</b> | weak       | weak           | SGPPC   |
| weak                                                                                                                                                                                      | medium     | <b>PP</b> | weak       | weak           | SEPPC   |
| weak                                                                                                                                                                                      | weak       | <b>PP</b> | weak       | weak           | SCPPC   |
